# Supplementary material for: Global maps of aerosol single scattering albedo using combined CERES-MODIS retrieval
Source: Copernicus journal article supplement (doi:10.5194/acp-2021-521), 2021-07-27
Supplement: Supplementary file 1 [file acp-2021-521-supplement.pdf]

## Supplementary Material

# Global maps of aerosol single scattering albedo using combined CERES-MODIS retrieval

Archana Devi<sup>1</sup>, Sreedharan K Satheesh<sup>1,2,3</sup>

<sup>1</sup>Centre for Atmospheric and Oceanic Sciences, Indian Institute of Science, Bengaluru, India

<sup>2</sup>Divecha Centre for Climate Change, Indian Institute of Science, Bengaluru, India

<sup>3</sup>DST Centre of Excellence in Climate Change, Indian Institute of Science, Bengaluru, India

Correspondence to: Archana Devi (archana.shiva13@gmail.com)

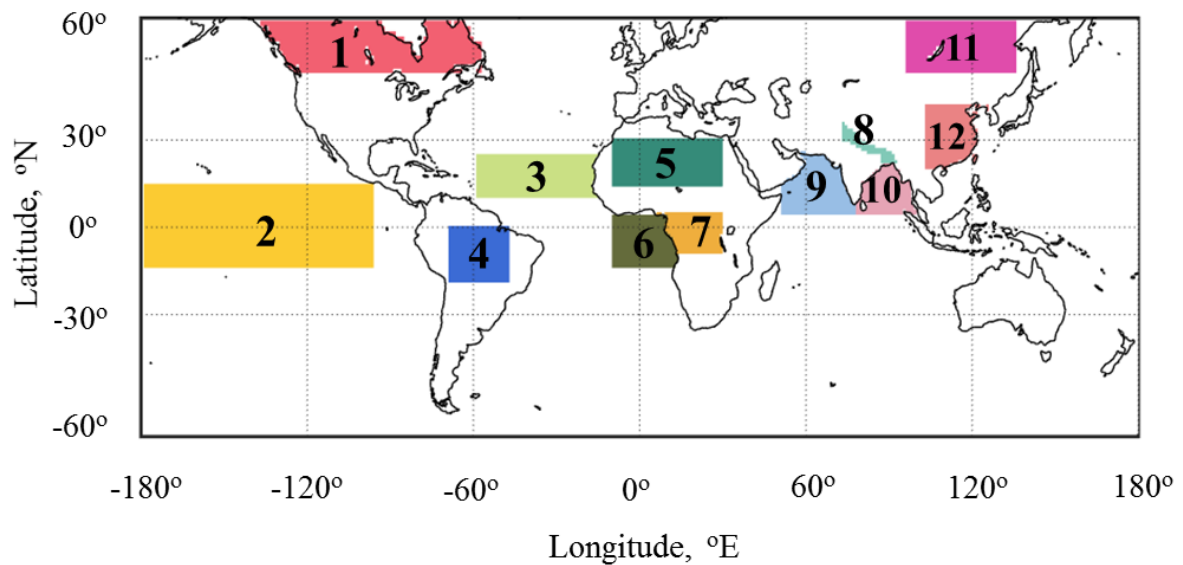

**Figure S1.** Regions of interest (ROI). Details of each region are provided in Table S1

**Table 1.** Details of the regions shown in Fig. S1

| ROI No: | Region                 | General aerosol characteristics                                                                 | Lat limit, °N | Lon limit, °E |
|---------|------------------------|-------------------------------------------------------------------------------------------------|---------------|---------------|
| 1       | Canadian Boreal Forest | Relatively pristine with seasonal biomass burning                                               | 48 to 60      | -140 to -58   |
| 2       | Eastern Pacific        | Less polluted oceanic region                                                                    | -15 to 15     | -180 to -97   |
| 3       | North East Atlantic    | Highly polluted by dust transport and continental outflow from biomass burning                  | 10 to 25      | -60 to -10    |
| 4       | Amazon                 | Relatively pristine with seasonal biomass burning                                               | -20 to 0      | -70 to -48    |
| 5       | Sahara                 | Desert region with seasonal dust storms                                                         | 14 to 30      | -11 to 28     |
| 6       | Southeast Atlantic     | Highly polluted by dust transport and continental outflow from biomass burning                  | -15 to 4      | -11 to 15     |
| 7       | South African Forest   | Relatively pristine with seasonal biomass burning                                               | -10 to 5      | 3 to 29       |
| 8       | Indo Gangetic Plain    | A highly polluted industrial region with seasonal stubble burning and dust from the Thar desert | 22 to 35      | 72 to 92      |
| 9       | Arabian Sea            | Continental outflow of pollution and dust                                                       | 4 to 26       | 50 to 77      |
| 10      | Bay of Bengal          | Continental outflow of pollution                                                                | 4 to 24       | 77 to 99      |
| 11      | Russian Boreal Forest  | Relatively pristine with seasonal biomass burning                                               | 48 to 60      | 95 to 135     |
| 12      | Eastern China          | A highly polluted industrial region                                                             | 20 to 40      | 102 to 125    |
